# Supplementary material for: Endothelial jagged-2 sustains hematopoietic stem and progenitor reconstitution after myelosuppression
Source: JCI journal article supplement (doi:10.1172/jci92309), 2017-10-23
Supplement: sd1 [file 1]

**SUPPLEMENTARY FIGURE 1**

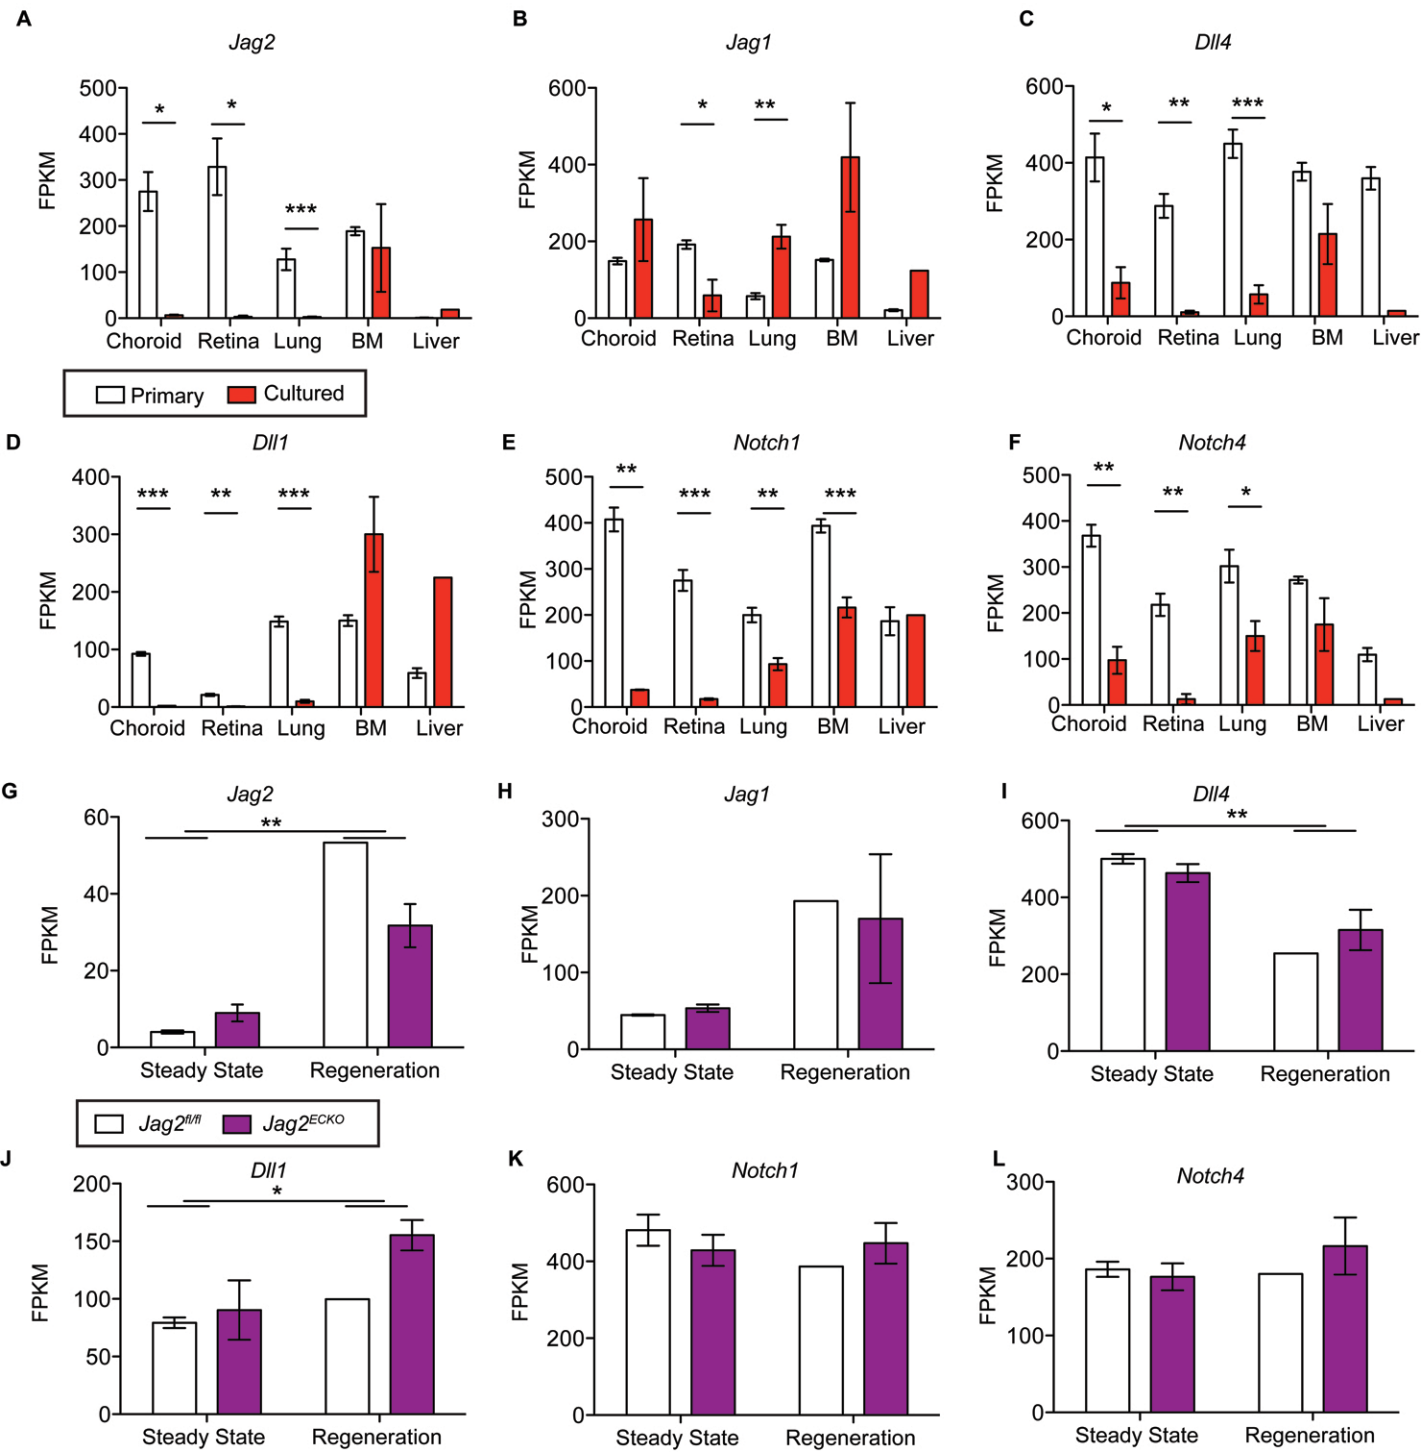

# SUPPLEMENTARY FIGURE 2

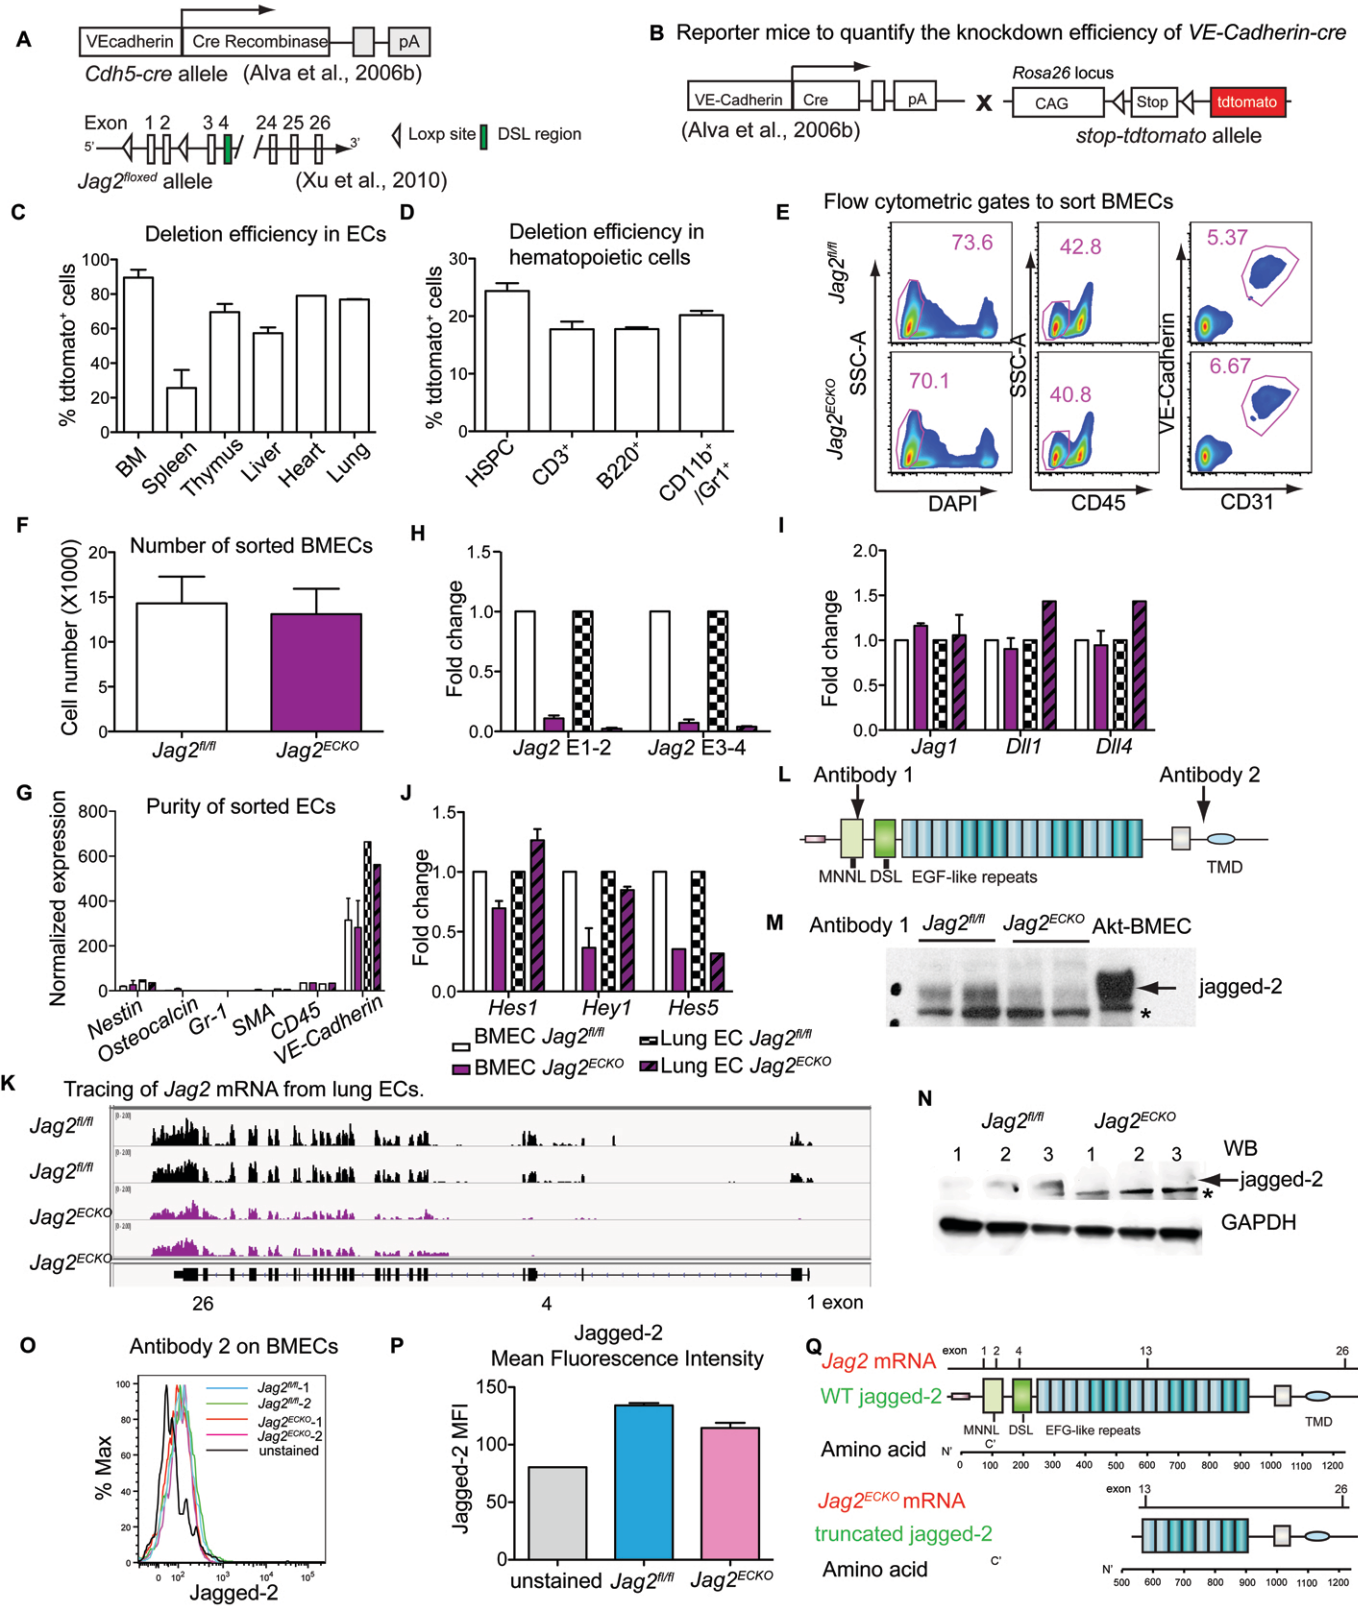

**A.** Full gel image for **Supplementary Figure 2M**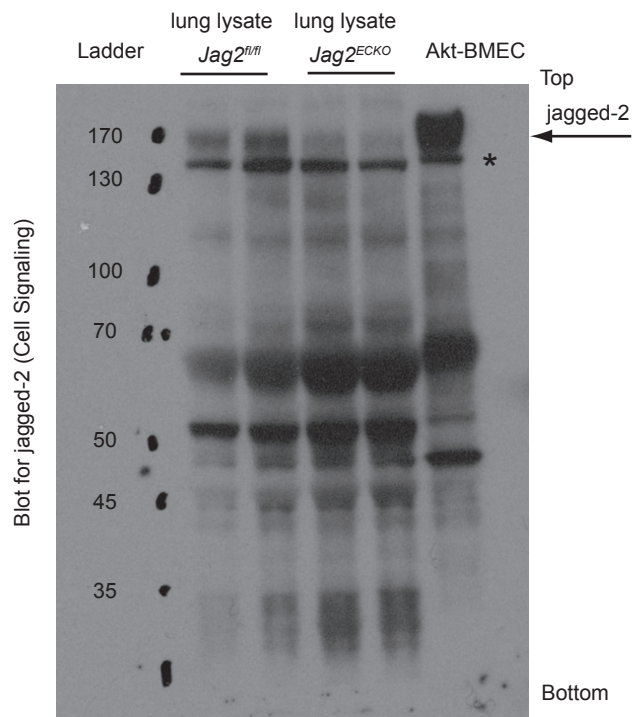

Loading amount: For lung lysate: 100 micrograms of total protein.

For Akt-BMEC: 25 micrograms of total protein.

\* non-specific band

**B.** Full gel image for **Supplementary Figure 2N (jagged-2)**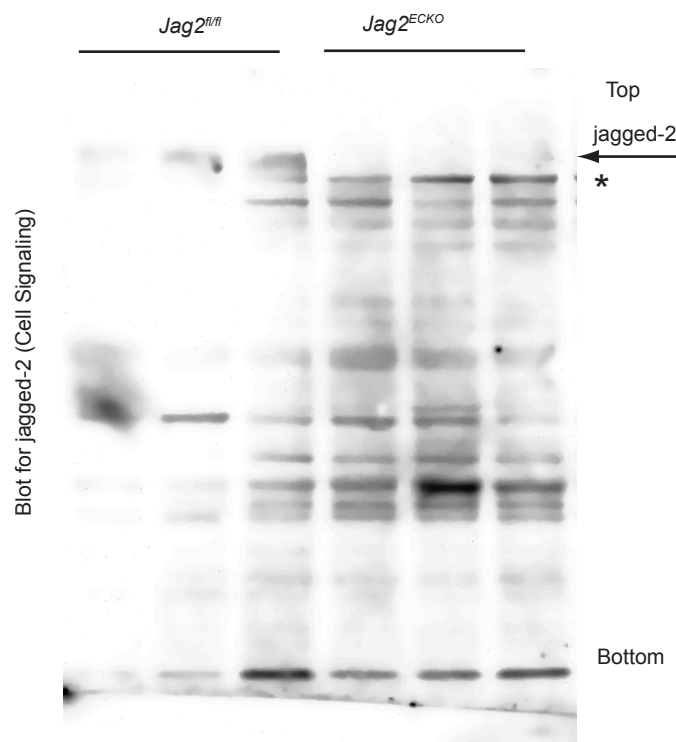

\* non-specific band

**C.** Full gel image for **Supplementary Figure 2N (GAPDH)**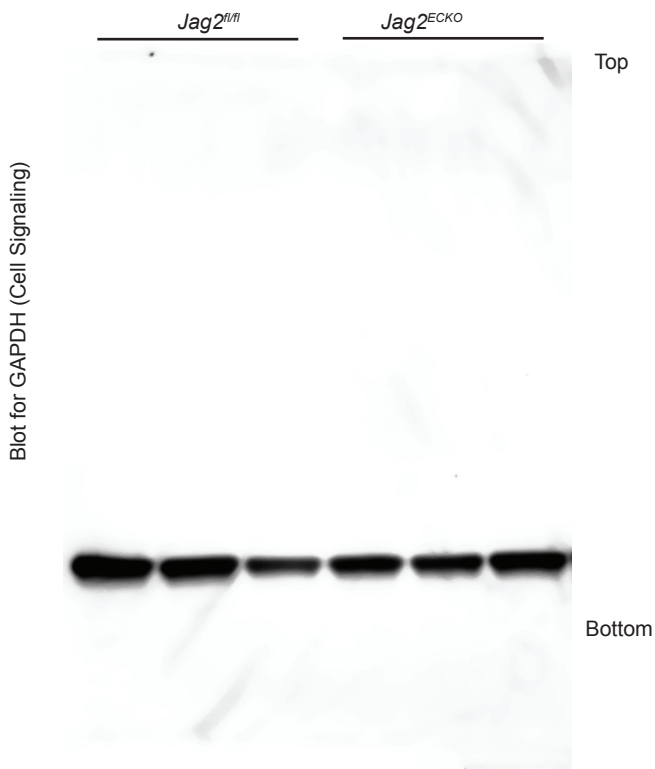**D.** Half length gel image for jagged-2 expression in BMECs  
Not shown in article. Related to reviewer B comment 8.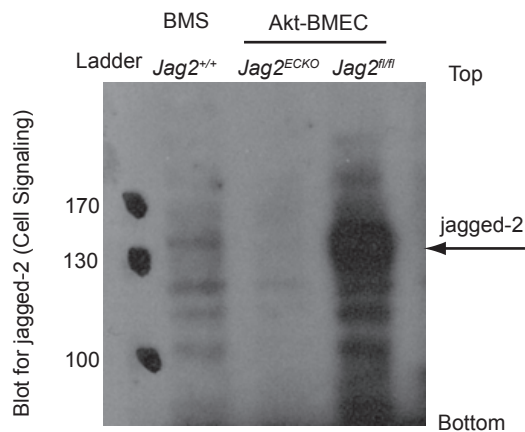

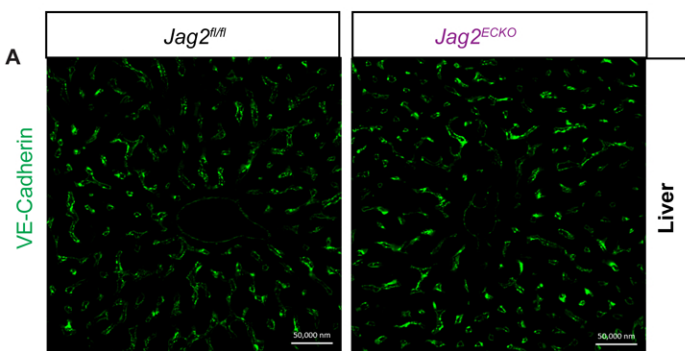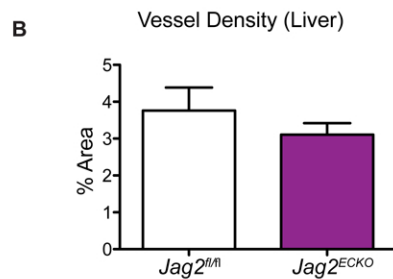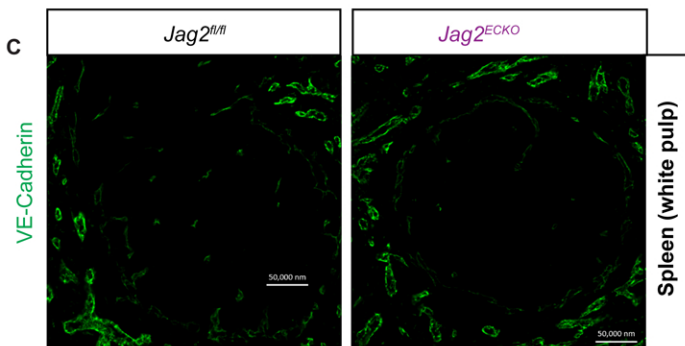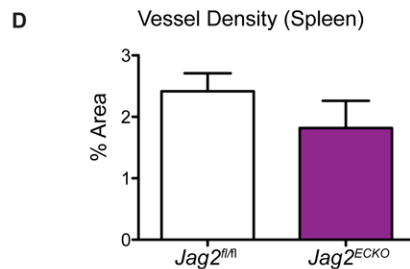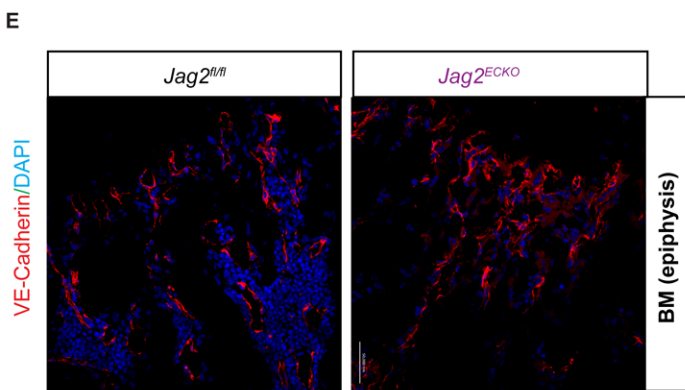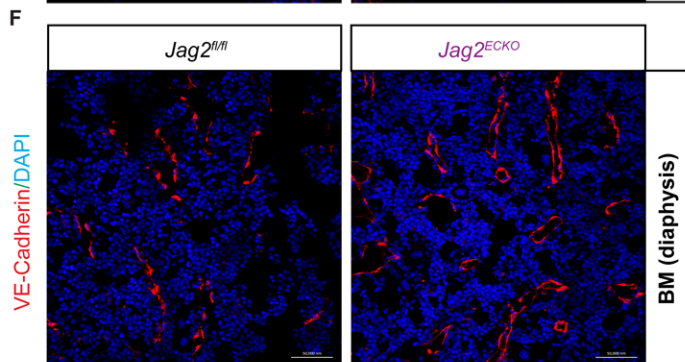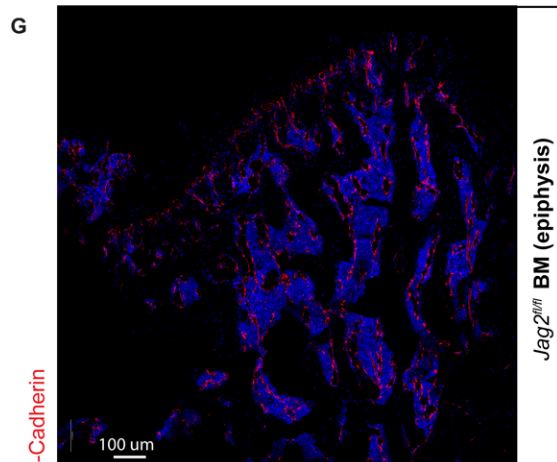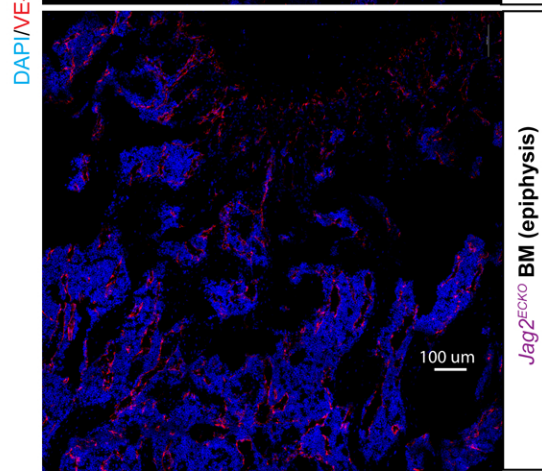



# SUPPLEMENTARY FIGURE 4

## A *Jag2* mRNA tracing in mouse liver ECs

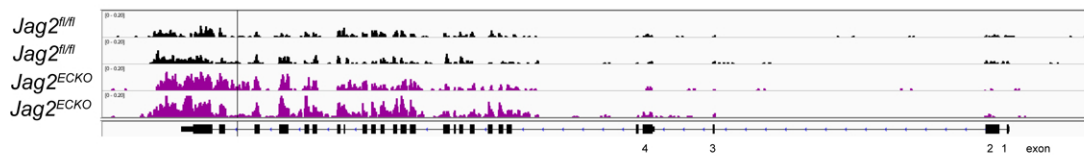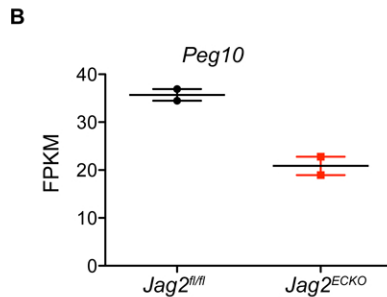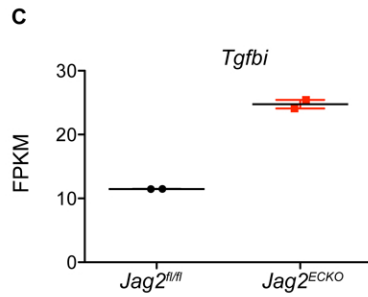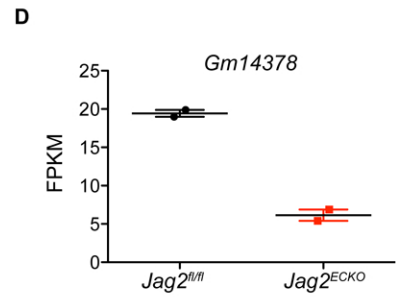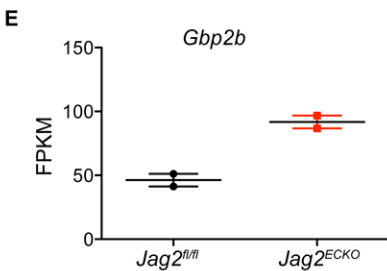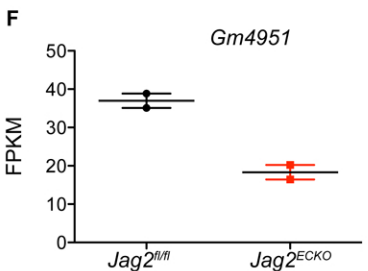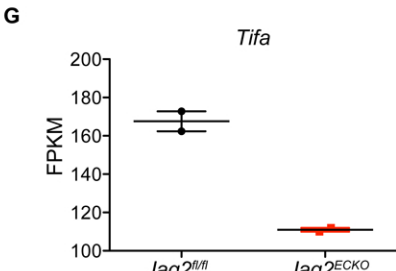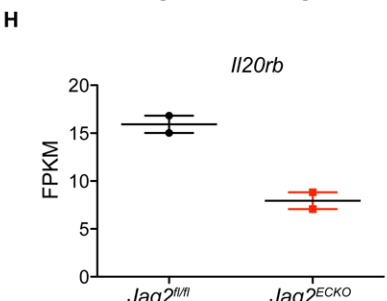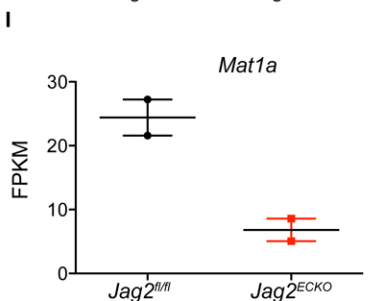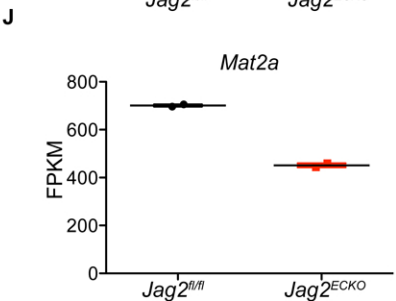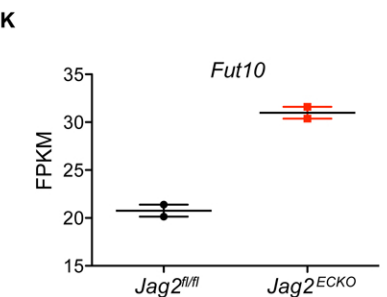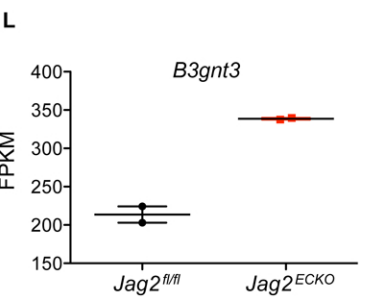

**SUPPLEMENTARY FIGURE 5**

**A. Flow cytometry plots of HSPCs under indicated conditions**

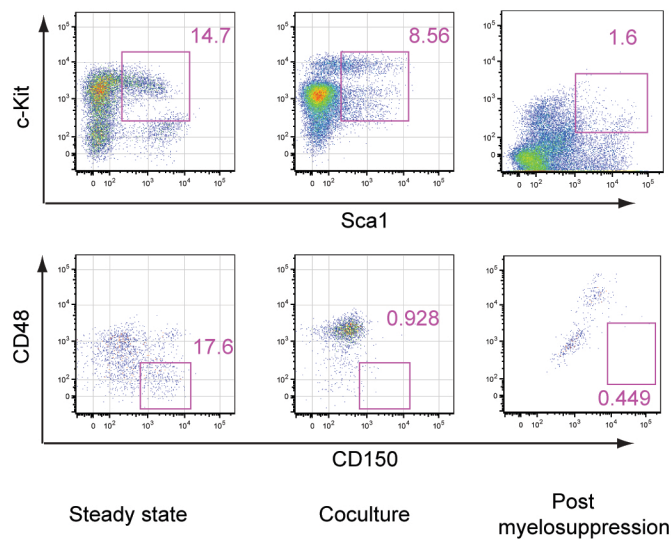

**E Representative flow plots for B220<sup>+</sup> cells.**

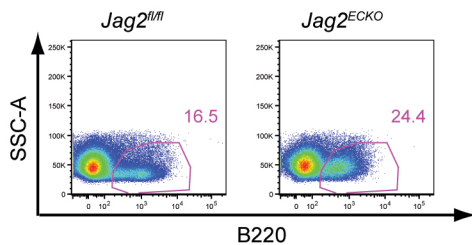

**F Gated on Ter119<sup>-</sup> cells B220<sup>+</sup> cells backgated**

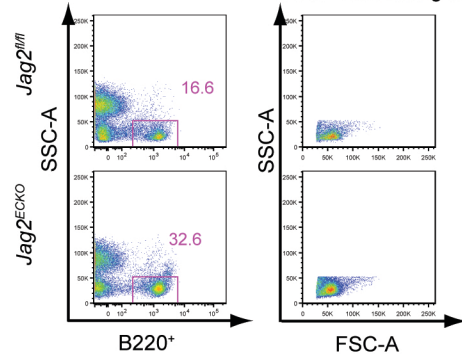

**B**

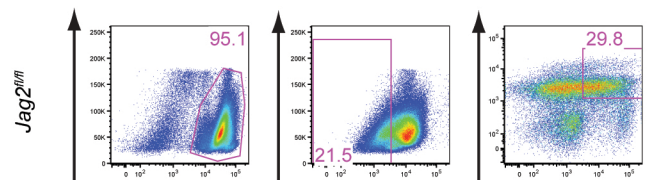

**C**

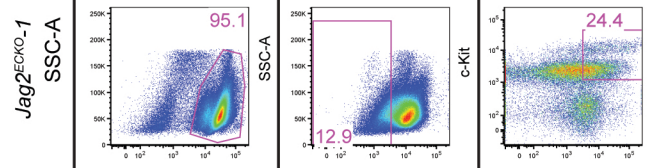

**D**

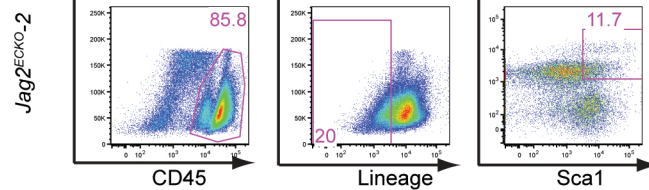

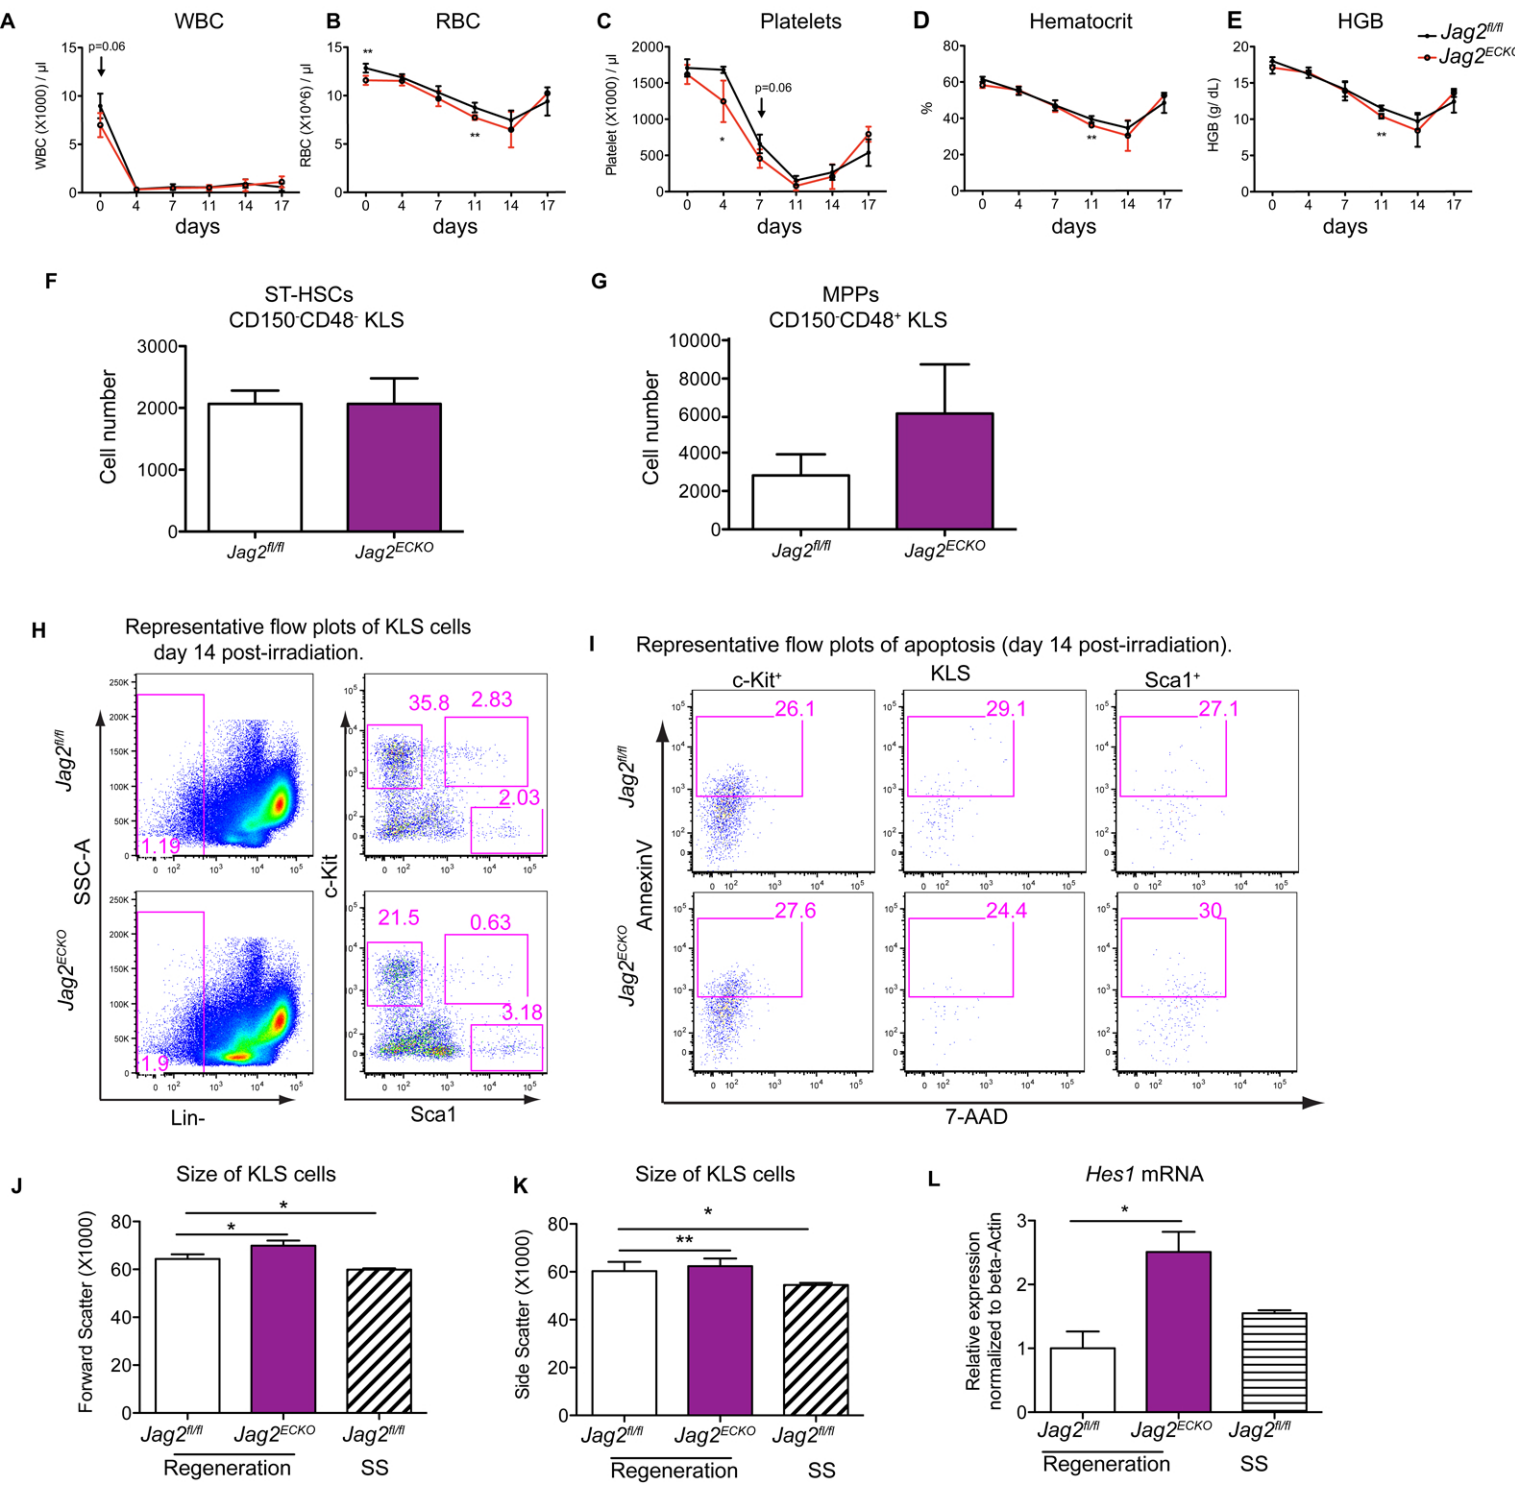

## Supplementary Figure Legends

### Supplementary Figure 1. Differential expression of Notch ligands and receptors in tissue-specific ECs.

**A-F.** The FPKM values of Notch ligands *Jag2*, *Jag1*, *Dll4*, *Dll1* and Notch receptors *Notch1* and *Notch4* in primary ECs compared with cultured ECs from indicated organs. Note that cultured ECs have undergone passages and were transduced with lentivirus encoding myristoylated *Akt1*. 2-6 biological replicates were used to generate the data, except for cultured liver ECs (n=1). **G-I,** At steady state or post myeloablative injury, the FPKM values of Notch ligands *Jag2*, *Jag1*, *Dll4*, *Dll1* and the Notch receptors *Notch1* and *Notch4* were shown for liver ECs from *Jag2<sup>fl/fl</sup>* or *Jag2<sup>ECKO</sup>* mice (relate to **Supplementary Figure 2** for *Jag2<sup>ECKO</sup>* mouse). For steady state, n=2 each of *Jag2<sup>fl/fl</sup>* and *Jag2<sup>ECKO</sup>* were used. For regeneration state, n=1 for *Jag2<sup>fl/fl</sup>* and n=3 for *Jag2<sup>ECKO</sup>* were used. The height of columns indicates the mean and error bars indicate S.E.M.. For **G-L**, the data points from the steady state were combined from the liver ECs of *Jag2<sup>fl/fl</sup>* and *Jag2<sup>ECKO</sup>* mice (n=4 in total), and the data points from the regeneration were combined from *Jag2<sup>fl/fl</sup>* and *Jag2<sup>ECKO</sup>* mice (n=4 in total), the p-value was then calculated between steady state and regeneration state. p-value was calculated using unpaired 2-tailed t-test. \* p<0.05; \*\* p<0.01; \*\*\* p<0.001.

### Supplementary Figure 2. Truncated *Jag2* mRNA and truncated jagged-2 protein are generated from ECs in *Jag2<sup>ECKO</sup>* mice, compared with *Jag2<sup>fl/fl</sup>* mice.

**A.** Schematic representation of *VE-Cadherin promoter-driven cre* recombinase transgenic line (17) and *Jag2<sup>flxed</sup>* line (18) used to generate EC-specific *Jag2* conditional deletion mice. **B.** The breeding strategies to quantify the deletion efficiency within ECs. Deletion efficiency of *VE-Cadherin-cre* (20) in ECs (**C**) from various organs, and hematopoietic cells in the BM (**D**) (n=3



biological replicates). **E.** Flow cytometric plots to sort out BMECs. **F.** The number of BMECs sorted from *Jag2<sup>fl/fl</sup>* and *Jag2<sup>ECKO</sup>* mice (n=5 for each genotype). **G.** The purity of sorted ECs were examined using the following primers, *Nestin* for mesenchymal stromal cells, *Osteoclastin* for osteoblasts, *Gr-1* for granulocytes, *SMA* for smooth muscle cells, *CD45* for hematopoietic cells and *VE-Cadherin* for ECs (n=2). **H.** Deletion efficiency of *Jag2* mRNA at different regions. **I-J,** The mRNA expression level of Notch ligands *Jag1*, *Dll1*, *Dll4* and Notch targets *Hes1*, *Hey1* and *Hes5* in BMEC or lung microvascular ECs of *Jag2<sup>fl/fl</sup>* and *Jag2<sup>ECKO</sup>* mice was quantified (n=3 for *Jag1*, n=2 for *Dll1*, *Dll4*, *Hes1* and *Hey1*). **K.** Tracing of *Jag2* mRNA in primary lung ECs from *Jag2<sup>fl/fl</sup>* and *Jag2<sup>ECKO</sup>* mice (n=2 for each genotype). **L.** Schematic view of domain organization of full-length mouse jagged-2 protein and the two antibodies used to detect the N- or C-terminus region of jagged-2 protein. **M.** Using antibody 1, the whole tissue lysate of lungs was subjected to western blot analysis (n=2 for each genotype). **N.** Using antibody 1, the expression of N-terminus jagged-2 protein in Akt-BMECs from *Jag2<sup>fl/fl</sup>* and *Jag2<sup>ECKO</sup>* mice was determined by western blot. **O.** Using antibody 2, the expression level of C-terminus jagged-2 was detected using flow cytometry (n=2 for each genotype). **P.** Quantification of mean fluorescence intensity (MFI) of jagged-2 expression in the BMECs. **Q.** Based on these data, a model of *Jag2* mRNA and protein expression was summarized. Error bars indicate S.E.M.. \* in panel **M** and **N** indicated the non-specific bands. Please see the full, uncut western blot gels in the supplementary materials. The numbers in the flow plots represent percentages of cells.

**Supplementary Figure 3. Loss of *Jag2* in ECs did not significantly alter the perfusion function and vascular patterning.** The vasculature patterning of liver (**A**), spleen (**C**) and BM epiphysis (**E**), BM diaphysis regions (**F**) of *Jag2<sup>fl/fl</sup>* and *Jag2<sup>ECKO</sup>* mice are shown. The

quantification of liver (**B**) and spleen (**D**) vasculature density (% VE-Cadherin<sup>+</sup> over area) are shown. For image panels in **A**, **C** and **E**, scales bar is 50 micrometers. **G**. Lower magnification of BM epiphysis region focusing on the tip of femur opposing the growth plate. Scale bars in **G** are 100 micrometers. Error bar is S.E.M.. For **a**, n=4 for *Jag2<sup>fl/fl</sup>*, n=3 for *Jag2<sup>ECKO</sup>*. For the rest of figure panels, n=3 for *Jag2<sup>fl/fl</sup>*, n=2 for *Jag2<sup>ECKO</sup>*. Mice were 6 weeks old, male.

**Supplementary Figure 4. The altered molecular signatures of liver ECs upon loss of *Jag2*.**

**A**. Tracing of *Jag2* mRNA in the RNA sequencing profile of liver ECs from *Jag2<sup>fl/fl</sup>* and *Jag2<sup>ECKO</sup>* mice. **B-D**. Differentially regulated mRNAs that are related to the TGF-beta signaling pathway. **E-J**. Differentially expressed mRNAs that are related to the interferon gamma or TNF-alpha signaling pathways. **K,L**. Differentially expressed gene related to the cell-surface glycan modifications.

**Supplementary Figure 5. BMEC-derived jagged-2 inhibits the differentiation of HSPCs into B cell lineage.**

**A**. Flow cytometric plots of the HSPCs when freshly isolated from wild type mice (n=5), or during the coculture with BMECs (coculture) (n=3) and at day 16-post myeloablative injury of 650 cGy irradiation (post myelosuppression) (n=5). The flow cytometric plots for the post-myelosuppression conditions (upper and lower panels) are from the same experiment as presented in **Fig. 6A** (first and second plots of the upper row). The expression pattern of CD150 versus CD48 within KLS cells indicated that coculture of Lin<sup>-</sup> cells on BMECs mimics the regeneration of KLS cells following myelosuppression. **B-D**. Representative flow plots for the gating of LSK HSPCs when Lin<sup>-</sup> cells were cultured with *Jag2<sup>fl/fl</sup>* BMECs, and two batches of *Jag2<sup>ECKO</sup>* BMECs. *Jag2<sup>ECKO</sup>-1* and *Jag2<sup>ECKO</sup>-2* BMECs indicate BMECs from two different *Jag2<sup>ECKO</sup>* mice. 3

biological replicates of Lin<sup>-</sup> cells were used to do the coculture experiments. The percentage of Hes1-GFP<sup>+</sup> cells among the KLS cells was also shown. In panel **B** and **D**, the third row from the left is the same flow plots presented in **Figure 3H** from left to right. **E**. The representative flow cytometric plots of B220<sup>+</sup> cells among the cocultured hematopoietic cells are shown. **F**. Representative flow plots for the B220<sup>+</sup> cells within the peripheral blood of 18 month-old *Jag2<sup>fl/fl</sup>* or *Jag2<sup>ECKO</sup>* mice (n=7 for *Jag2<sup>fl/fl</sup>*, n=8 for *Jag2<sup>ECKO</sup>*). The numbers in the flow plots represent percentages of cells.

**Supplementary Figure 6. Peripheral blood counts and apoptosis rate of BM cells during hematopoietic regeneration post myelosuppressive stress.** Post 650 cGy sublethal irradiation, complete blood count (CBC) was quantified. The number of white blood cell count (WBC) (**A**), RBC count (**B**), platelets (**C**), hematocrit (**D**) and hemoglobin (HG) content (**E**) in the peripheral blood were quantified (n=4 each for *Jag2<sup>fl/fl</sup>* or *Jag2<sup>ECKO</sup>*). (**F-G**) at day 16 post-irradiation, the number of ST-HSCs and MPPs was quantified. **H, I**. at day 14-post 650 cGy irradiation, the flow cytometric gating of hematopoietic populations and their apoptosis status in *Jag2<sup>fl/fl</sup>* or *Jag2<sup>ECKO</sup>* mice. **J,K**. forward scatter and side scatter of KLS cells from *Jag2<sup>fl/fl</sup>* and *Jag2<sup>ECKO</sup>* on day 21-22 post 650 cGy irradiation. SS indicates steady state conditions. **L**. *Hes1* mRNA expression level in the KLS cells on day 21-post 650 cGy irradiation (n=3 for *Jag2<sup>fl/fl</sup>*, n=5 for *Jag2<sup>ECKO</sup>* mice for Regeneration experiments; n=2 for SS experiments). Error bars indicate S.E.M.. p-value was calculated using unpaired 2-tailed student t-test. \* p<0.05; \*\* p<0.01. The numbers in the flow plots represent percentages of cells.

**Table 1. List of Antibodies used in this study**

| <i>Antibody</i>      | <i>Clone number</i> | <i>Company</i> | <i>Note for applications</i>             |
|----------------------|---------------------|----------------|------------------------------------------|
| <b>VE-Cadherin</b>   | BV13                | Biologend      | Flow Cytometry                           |
| <b>VE-Cadherin</b>   | AF1002              | R and D        | IF                                       |
| <b>CD31</b>          | 390                 | Biologend      | Flow Cytometry                           |
| <b>CD45</b>          | 30-F11              | Biologend      | Flow Cytometry                           |
| <b>Ter119</b>        | Ter119              | Biologend      | Flow Cytometry                           |
| <b>B220</b>          | RA3-6B2             | Biologend      | Flow Cytometry                           |
| <b>CD3</b>           | 17A2                | Biologend      | Flow Cytometry                           |
| <b>Gr-1</b>          | RB6-85C             | Biologend      | Flow Cytometry                           |
| <b>CD11b</b>         | M1/70               | Biologend      | Flow Cytometry                           |
| <b>CD41</b>          | MWReg30             | Biologend      | Flow Cytometry                           |
| <b>c-Kit</b>         | 2B8                 | Biologend      | Flow Cytometry                           |
| <b>Sca1</b>          | D7                  | Biologend      | Flow Cytometry                           |
| <b>CD150</b>         | TC15-F12.2          | Biologend      | Flow Cytometry                           |
| <b>CD48</b>          | HM48-1              | Biologend      | Flow Cytometry                           |
| <b>CD34</b>          | Mec14.7             | Biologend      | Flow Cytometry                           |
| <b>Ki67</b>          | B56                 | BD Biosciences | Flow Cytometry                           |
| <b>CD105</b>         | MJ7/18              | Biologend      | Flow Cytometry                           |
| <b>CD127</b>         | A7R34               | Biologend      | Flow Cytometry                           |
| <b>CD16/32</b>       | 93                  | Biologend      | Flow Cytometry                           |
| <b>Jagged2</b>       | HMJ2-1              | Biologend      | Flow Cytometry                           |
| <b>Jagged2 (Ab2)</b> | H-143               | Santa Cruz     | Flow Cytometry and Western blot          |
| <b>Jagged2 (Ab1)</b> | C23D2               | Cell Signaling | IF and western blot                      |
| <b>Jagged1</b>       | polyclonal          | abcam #85763   | Western blot                             |
| <b>Dll1</b>          | #2588 (catlog)      | Cell Signaling | Western blot                             |
| <b>Dll4</b>          | #2589 (catlog)      | Cell Signaling | Western blot                             |
| <b>CD31</b>          | Mec 13.3            | Biologend      | Dynabeads isolation of endothelial cells |
| <b>GAPDH</b>         | #2118 (catlog)      | Cell Signaling | Western blot                             |
| <b>beta-actin</b>    | AC-74               | Sigma          | Western blot                             |



**Table 2. List of primers used in this study**

| <i>Primer name</i>  | <i>Sequence (5'-3')</i>      |
|---------------------|------------------------------|
| Jag2 E1-2 forward   | GGCTGCTGCTGCTACTGGT          |
| Jag2 E1-2 reverse   | GCACACGCGCACGTACGTGTC        |
| Jag2 E3-4 forward   | CAATGACACCACTCCAGATGAG       |
| Jag2 E3-4 reverse   | CGCACGCTGGCATGATCAAC         |
| Jag1 forward        | AACGACCGTAATCGCATCGTACTGC    |
| Jag1 reverse        | CAGCCAAAGCCATAGTAGTGGTCATCAC |
| Dll1 forward        | CCCATCCGATTCCCCTTCG          |
| Dll1 reverse        | GGTTTTCTGTTGCGAGGTCATC       |
| Dll4 forward        | TTCCAGGCAACCTTCTCCGA         |
| Dll4 reverse        | ACTGCCGCTATTCTTGTCCC         |
| Notch1 forward      | CCCTTGCTCTGCCTAACGC          |
| Notch1 reverse      | GGAGTCCTGGCATCGTTGG          |
| Notch2 forward      | GACTGCCAATACTCCACCTCT        |
| Notch2 reverse      | CCATTTTCGCAGGGATGAGAT        |
| Notch3 forward      | TGCCAGAGTTCAGTGGTGG          |
| Notch3 reverse      | CACAGGCAAATCGGCCATC          |
| Notch4 forward      | CTCTTGCCACTCAATTTCCCT        |
| Notch4 reverse      | TTGCAGAGTTGGGTATCCCTG        |
| Hey1 forward        | CCGACGAGACCGAATCAATAAC       |
| Hey1 reverse        | TCAGGTGATCCACAGTCATCTG       |
| Hey2 forward        | AAGCGCCCTTGTGAGGAAAC         |
| Hey2 reverse        | GGTAGTTGTTCGGTGAATTGGA       |
| Hes1 forward        | CCAGCCAGTGTC AACACGA         |
| Hes1 reverse        | AATGCCGGGAGCTATCTTTCT        |
| Sma forward         | GTCCAGACATCAGGGAGTAA         |
| Sma reverse         | TCGGATACTTCAGCGTCAGGA        |
| Gapdh forward       | AAATGGTGAAGGTCGGTGTGAACG     |
| Gapdh reverse       | GGTCAATGAAGGGGTCGTTGATGG     |
| cre forward         | ATGTCCAATTTACTGACCGTACACCA   |
| cre reverse         | ACGATGAAGCATGTTTAGCTGGCCCA   |
| cre forward (FG)    | GCGGTCTGGCAGTAAAACTATC       |
| cre reverse (FG)    | GTGAAACAGCATTGCTGTCACTT      |
| nestin forward      | CCCTGAAGTCGAGGAGCTG          |
| nestin reverse      | CTGCTGCACCTCTAAGCGA-3        |
| osteocalcin forward | TCTCTCTGACCTCACAGATGCCAAGC   |
| osteocalcin reverse | AGCCATACTGGTCTGATAGCTCGTCAC  |
| Gr-1 forward        | GACTTCCTGCAACACA ACTACC      |
| Gr-1 reverse        | ACAGCATTACCAGTGATCTCAGT      |
| CD45 forward        | TACACCCAGTGATGGTGTG          |
| CD45 reverse        | GCTGCTGAATGTCTGAGTG          |
| VE-Cadherin forward | TGTGTTTTTCGCACCAGGTATTCA     |
| VE-Cadherin reverse | CAATGCTGAAATACTCATTTCCT      |

|              |                       |
|--------------|-----------------------|
| Hes5 forward | AGTCCCAAGGAGAAAAACCGA |
| Hes5 reverse | GCTGTGTTTCAGGTAGCTGAC |
